# Supplementary material for: Multi-Omics Analysis to Understand the Effects of Dietary Proanthocyanidins on Antioxidant Capacity, Muscle Nutrients, Lipid Metabolism, and Intestinal Microbiota in Cyprinus carpio
Source: MDPI journal article supplement (doi:10.3390/antiox12122095), 2023-12-10
Supplement: s1 [file s1]

**Table S1** Formation and nutrient of the experimental diets [88]

| Ingredients (g/kg)                  | Dietary Pro levels (g/kg) |      |      |      |
|-------------------------------------|---------------------------|------|------|------|
|                                     | 0                         | 0.2  | 0.4  | 0.8  |
| Fish meal                           | 100                       | 100  | 100  | 100  |
| Wheat middling                      | 230                       | 230  | 230  | 230  |
| Rice bran                           | 74                        | 74   | 74   | 74   |
| Soybean meal                        | 140                       | 140  | 140  | 140  |
| Cotton seed meal                    | 140                       | 140  | 140  | 140  |
| Rape seed meal                      | 194                       | 194  | 194  | 194  |
| Corn germ meal                      | 50                        | 50   | 50   | 50   |
| Vitamin premix <sup>1</sup>         | 10                        | 10   | 10   | 10   |
| Mineral premix <sup>2</sup>         | 10                        | 10   | 10   | 10   |
| Soybean oil                         | 25                        | 25   | 25   | 25   |
| Ca(H <sub>2</sub> PO <sub>4</sub> ) | 10                        | 10   | 10   | 10   |
| Carboxymethylcellulose sodium       | 10.0                      | 9.8  | 9.6  | 9.2  |
| Choline chloride                    | 1                         | 1    | 1    | 1    |
| Pro                                 | 0                         | 0.2  | 0.4  | 0.8  |
| Sodium chloride                     | 6                         | 6    | 6    | 6    |
| Total                               | 1000                      | 1000 | 1000 | 1000 |
| Composition                         |                           |      |      |      |
| Crude protein (%)                   | 32.3                      | 32.3 | 32.3 | 32.3 |
| Crude lipid (%)                     | 5.3                       | 5.3  | 5.3  | 5.3  |
| Ash (%)                             | 5.4                       | 5.4  | 5.4  | 5.4  |

Note:<sup>1</sup>Vitamins supplied per kg of diet:5000 IU; V<sub>B1</sub> 10 mg; V<sub>D3</sub> 1000 IU; V<sub>B2</sub> 10 mg; V<sub>B12</sub> 0.02 mg; V<sub>E</sub> 50 mg; V<sub>B6</sub> 4 mg; V<sub>K3</sub> 2 mg; pantothenic acid 20 mg; folic acid 1 mg; niacin 20 mg; inositol 100 mg; biotin 0.2 mg; V<sub>C</sub> 200 mg; <sup>2</sup>Minerals supplied per kg of diet: Fe 100 mg; Zn 80 mg; Mn 8 mg; Mg 100 mg; Cu 3 mg;I 0.3 mg; Co 0.05 mg; Se 0.1 mg.

**Table S2.** Specific primer sequences for qPCR in the study.

| Gene                                                              | Primer sequence(5'-3')                                   |
|-------------------------------------------------------------------|----------------------------------------------------------|
| sterol 26-hydroxylase, mitochondrial ( <i>CYP27A1</i> )           | F: GATCGCATCTGTGTGTCCGAATA<br>R: GCGTAGTGACAGAGATGGAAC   |
| phosphoenolpyruvate carboxykinase 1 ( <i>pck1</i> )               | F: TGACCAGAGGAGGATCGTGT<br>R: TGCCCAGAATCAGCATGTGT       |
| acyl-CoA synthetase long chain family member 1a ( <i>acsl</i> )   | F: GCCTGGATGGGCAAAGAAAAG<br>R: CTGGTCAGTCTGCTGTTTGAAG    |
| CD36 molecule ( <i>CD36</i> )                                     | F: CCTCTCTCTACCCCACTTCCT<br>R: CCAGAACTGCCGTCTCGTTTA     |
| peroxisome proliferator-activated receptor alpha ( <i>ppara</i> ) | F: AGTGACCTGATGGAGCCGAA<br>R: AAGAGTAAGGCGTTGTCCGG       |
| carnitine palmitoyltransferase 1 ( <i>cpt1</i> )                  | F: TTGACCTACAGTTGAGCCGC<br>R: ACACCCGTGAGAACACCATT       |
| aquaporin 7 ( <i>aqp7</i> ),                                      | F: TTGGGGCATGGAGGTTTCA<br>R: ACTCCACCAATAAAGGGGGC        |
| cathepsin A ( <i>ctsa</i> )                                       | F: CCGTGTGCTGGTGTATAACG<br>R: GAACATCGTGAAGGCCGCTA       |
| galactosylceramidase a ( <i>galca</i> )                           | F: GGTGGAGATGGGCTGATGAC<br>R: TGAGGTTCCTTTACGGTCC        |
| glucosidase, beta, acid ( <i>gba</i> )                            | F: TACCGTTTCGTGAGAGTGCC<br>R: CACTCCAAGCACTGGCAAAC       |
| N-acylsphingosine amidohydrolase 1b ( <i>asah1b</i> )             | F: CTTTTGTGTTTCTGTGCTTGTCTG<br>R: CCAGGACACATCCCCTTCAAA  |
| acid phosphatase 5b, tartrate resistant ( <i>acp5b</i> )          | F: ATCAGCCCAGATCGCCTACT<br>R: TCCATATCAGATGTTGTTTGGCAG   |
| phospholipase A2, group XV ( <i>pla2g15</i> ),                    | F: ATGGAGACGGAACGGTCAAC<br>R: GTTCAGCAGCATGGCAACAT       |
| $\beta$ -actin                                                    | F: ATCCGTAAAGACCTGTATGCCA<br>R: GGGGAGCAATGATCTTGATCTTCA |

**Table S3.** The hydrolyzed amino acid composition in muscle of *C. carpio* fed on normal diet (NC) and Pro-supplemented diet (Pro)

| Amino acids<br>(g/100g, ww) | Groups       |              |      |
|-----------------------------|--------------|--------------|------|
|                             | NC           | Pro          | Sig. |
| ASP                         | 1.45 ± 0.04  | 1.29 ± 0.02  | ns   |
| Thr                         | 0.66 ± 0.02  | 0.59 ± 0.01  | ns   |
| Ser                         | 0.49 ± 0.01  | 0.45 ± 0.01  | ns   |
| Glu                         | 1.94 ± 0.05  | 1.71 ± 0.03  | ns   |
| Gly                         | 0.64 ± 0.02  | 0.6 ± 0.01   | ns   |
| Ala                         | 0.93 ± 0.03  | 0.83 ± 0.02  | ns   |
| Cys                         | 0.15 ± 0.01  | 0.13 ± 0.01  | ns   |
| Val                         | 0.75 ± 0.03  | 0.65 ± 0.02  | ns   |
| Met                         | 0.4 ± 0.02   | 0.35 ± 0.01  | ns   |
| Ile                         | 0.68 ± 0.03  | 0.59 ± 0.02  | ns   |
| Leu                         | 1.22 ± 0.05  | 1.08 ± 0.02  | ns   |
| Tyr                         | 0.49 ± 0.02  | 0.44 ± 0.01  | ns   |
| Phe                         | 0.66 ± 0.02  | 0.58 ± 0.01  | ns   |
| Lys                         | 1.51 ± 0.05  | 1.33 ± 0.02  | ns   |
| His                         | 0.53 ± 0.02  | 0.48 ± 0.01  | ns   |
| Arg                         | 0.88 ± 0.03  | 0.78 ± 0.02  | ns   |
| Pro                         | 0.47 ± 0.01  | 0.44 ± 0.01  | ns   |
| ΣEAA                        | 7.28 ± 0.27  | 6.43 ± 0.14  | ns   |
| ΣNEAA                       | 6.55 ± 0.2   | 5.87 ± 0.08  | ns   |
| ΣTAA                        | 13.82 ± 0.46 | 12.29 ± 0.22 | ns   |

EAA, essential amino acid; NEAA, non-essential amino acid; TAA, total amino acid; ww, wet weight; ns, no significant. The results are expressed as means ± SEM (n = 4).

**Table S4.** Valid data used in transcriptome analysis

| Sample | Raw Data(bp)  | Clean Data(bp) | Q <sub>20</sub> (%) | Q <sub>30</sub> (%) | GC (%) | Total mapped (%) |
|--------|---------------|----------------|---------------------|---------------------|--------|------------------|
| NC1    | 7,277,567,100 | 6,820,547,754  | 97.93               | 94.18               | 48.17  | 89.92            |
| NC2    | 6,301,162,500 | 5,922,190,150  | 97.97               | 94.24               | 46.93  | 89.78            |
| NC3    | 7,014,687,300 | 6,538,620,700  | 98.05               | 94.36               | 46.71  | 89.99            |
| NC4    | 7,172,630,100 | 6,741,544,805  | 97.90               | 94.05               | 46.84  | 89.28            |
| Pro1   | 7,467,783,300 | 7,005,632,038  | 98.13               | 94.63               | 47.01  | 88.97            |
| Pro2   | 6,406,988,100 | 6,010,963,360  | 97.88               | 94.06               | 46.02  | 89.69            |
| Pro3   | 5,730,362,700 | 5,392,441,669  | 97.93               | 94.14               | 45.55  | 89.24            |
| Pro4   | 7,252,806,900 | 6,828,604,916  | 97.69               | 93.65               | 45.04  | 89.92            |

GC, GC content in clean reads, Q<sub>20</sub> and Q<sub>30</sub> the base quality score (Q score) was no less than 20 and 30, respectively, in clean reads. NC, normal control group, Pro, Pro treatment group.

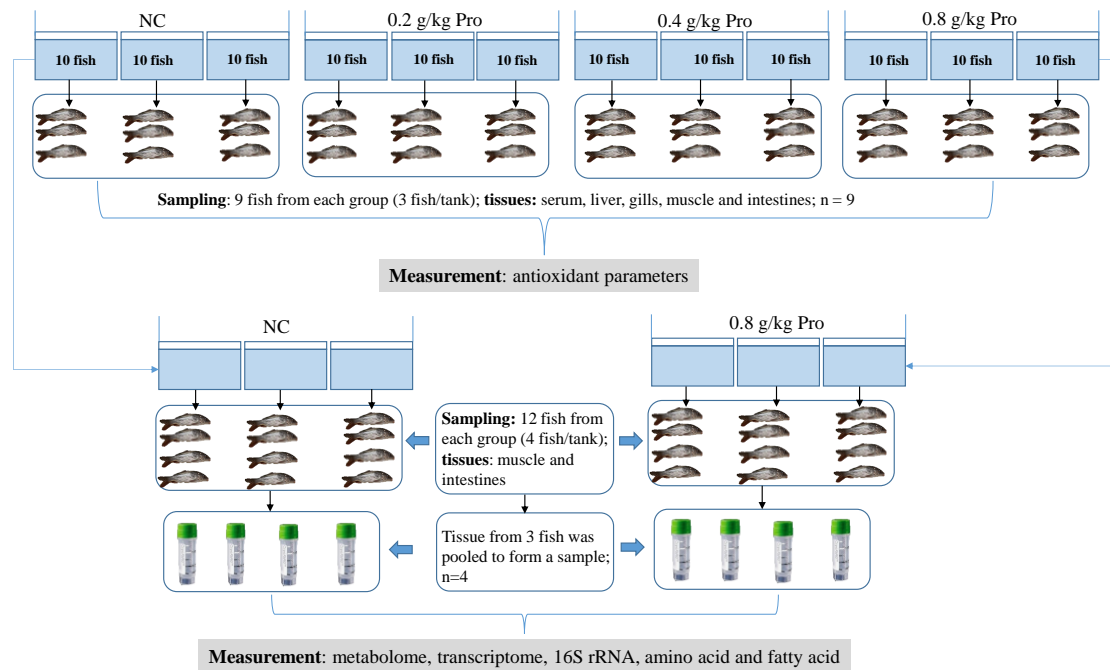

**Figure S1.** Schematic diagrams for experimental design and sampling

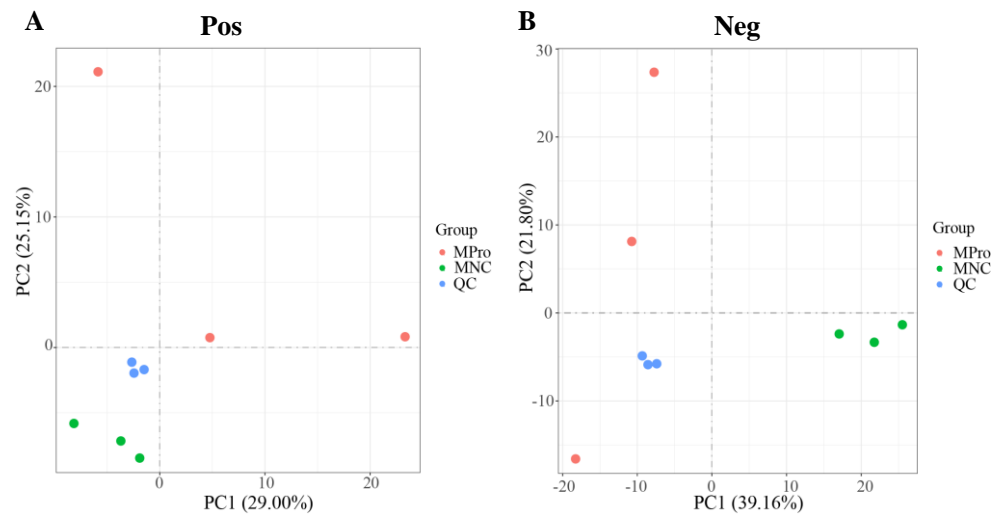

**Figure S2.** PCA score plot assessing quality of metabolomics data. **(A,B)** Metabolite profiles identified in positive (Pos) and negative (Neg) ion modes, respectively. MNC, NC group; MPro, Pro-fed group; QC, quality control samples. The QC samples exhibit tight clustering in both plots, indicating that the detection method is stable and the data is reliable.

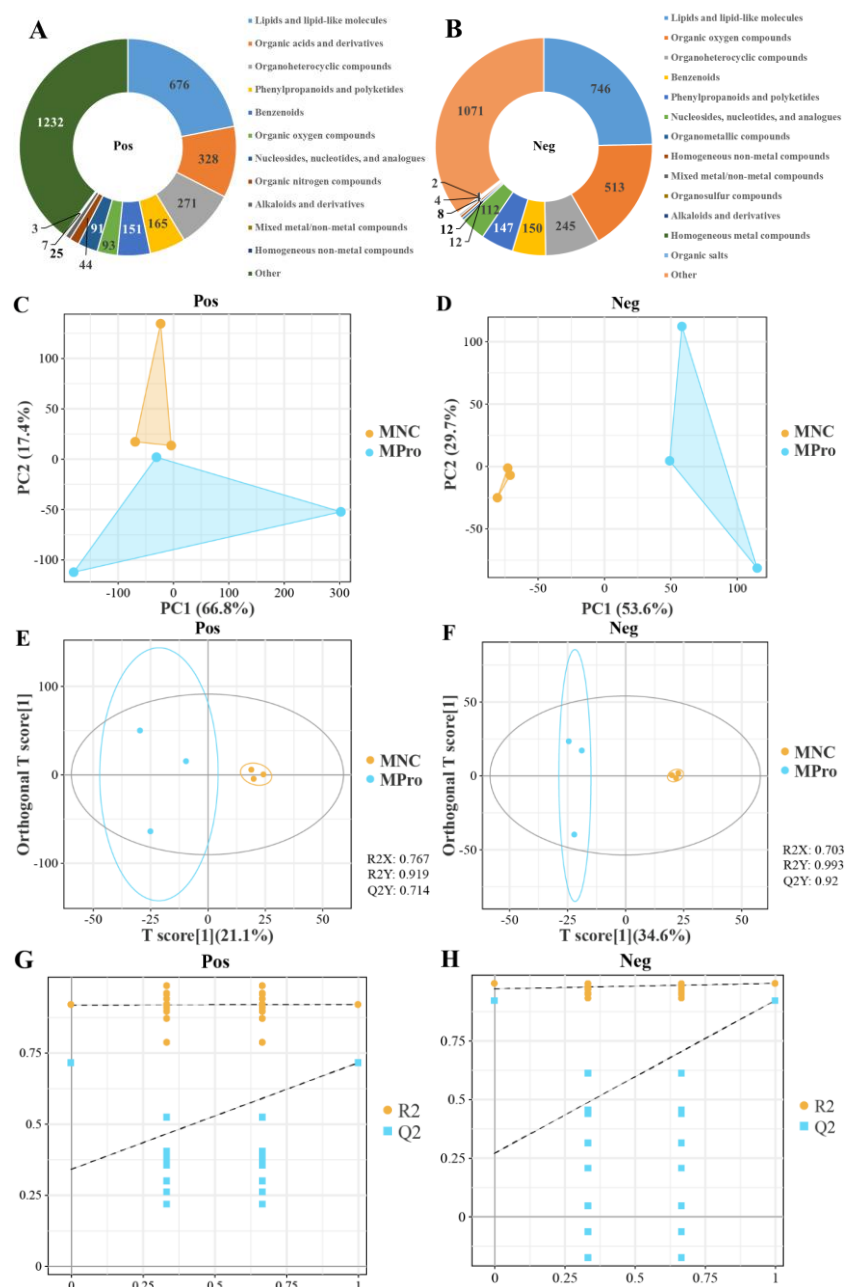

**Figure S3.** Metabolome analysis of muscle between NC and Pro groups. (A,B) Numbers and classification of the annotated metabolites in positive (Pos) and negative (Neg) ion modes. (C,D) PCA score plot of samples in MNC and MPro under Pos and Neg ion modes. (E,F) OPLS-DA score plot of samples in MNC and MPro under Pos and negative Neg ion modes. (G,H) Response-sorting test of the OPLS-DA in Pos and Neg ion modes.

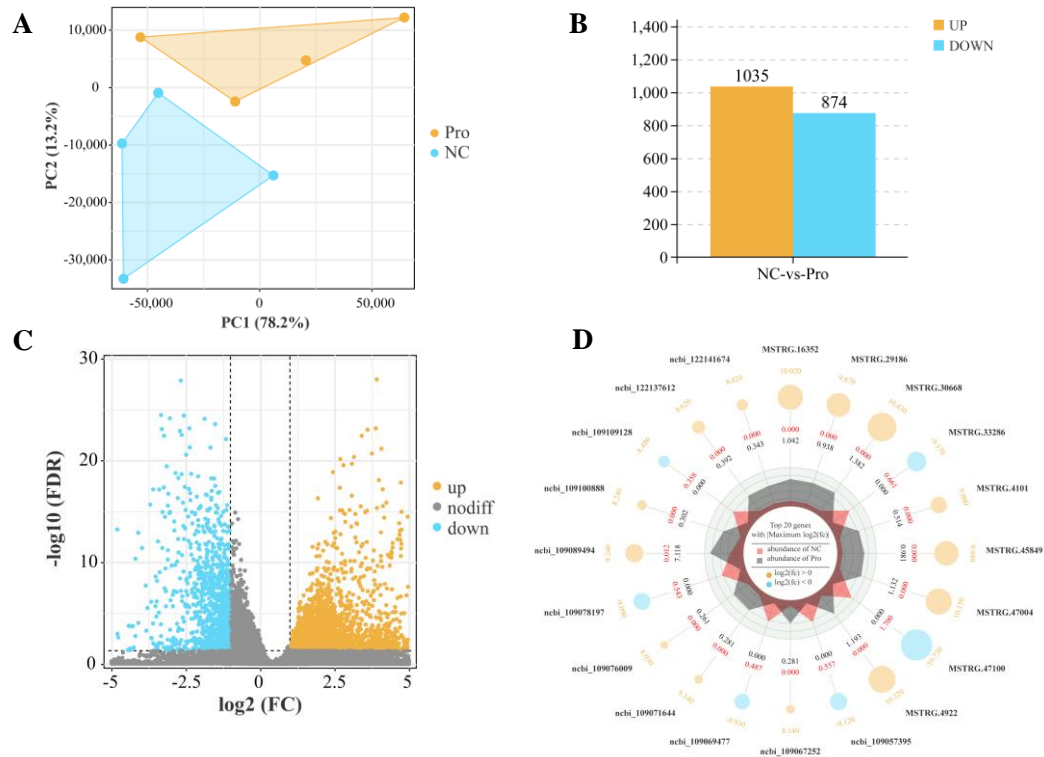

**Figure S4.** DEGs in intestines of *C. carpio* between the NC and Pro groups. **(A)** Correlation among samples in the NC and Pro groups. **(B)** Significantly up-regulated and down-regulated genes number in different groups. **(C)** Volcano plot of identified genes including up-regulated and down-regulated genes in the RNA-seq. **(D)** Top 20 DEGs induced by Pro treatment.



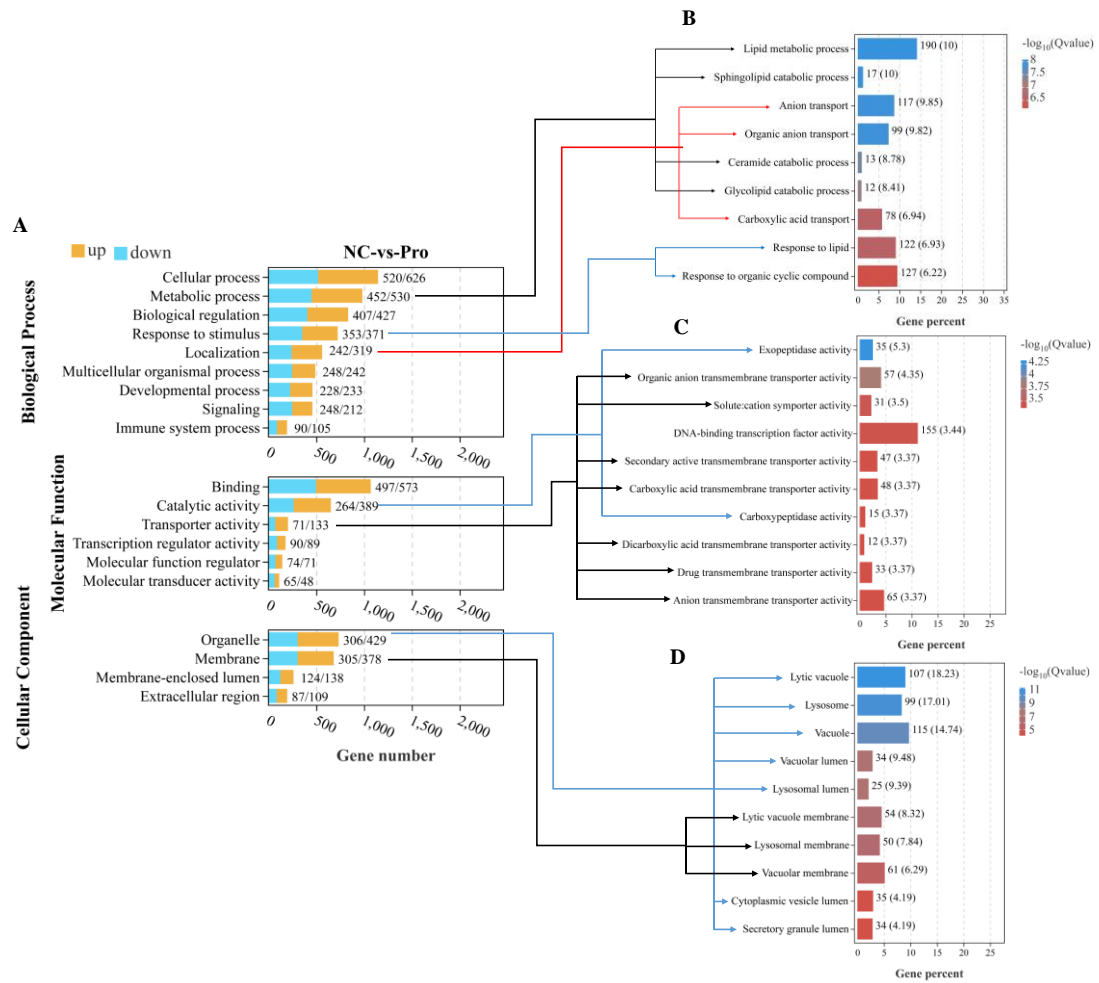

**Figure S5.** GO enrichment analysis for the DEGs in the intestines of *C. carpio* between the NC and Pro groups. **(A)** GO enrichment terms of DEGs in level 1 GO term and level 2 GO term. **(B)** The top 10 GO terms in the biological process category. **(C)** The top 10 GO terms in the molecular function category. **(D)** The top 10 GO terms in the cellular component category.

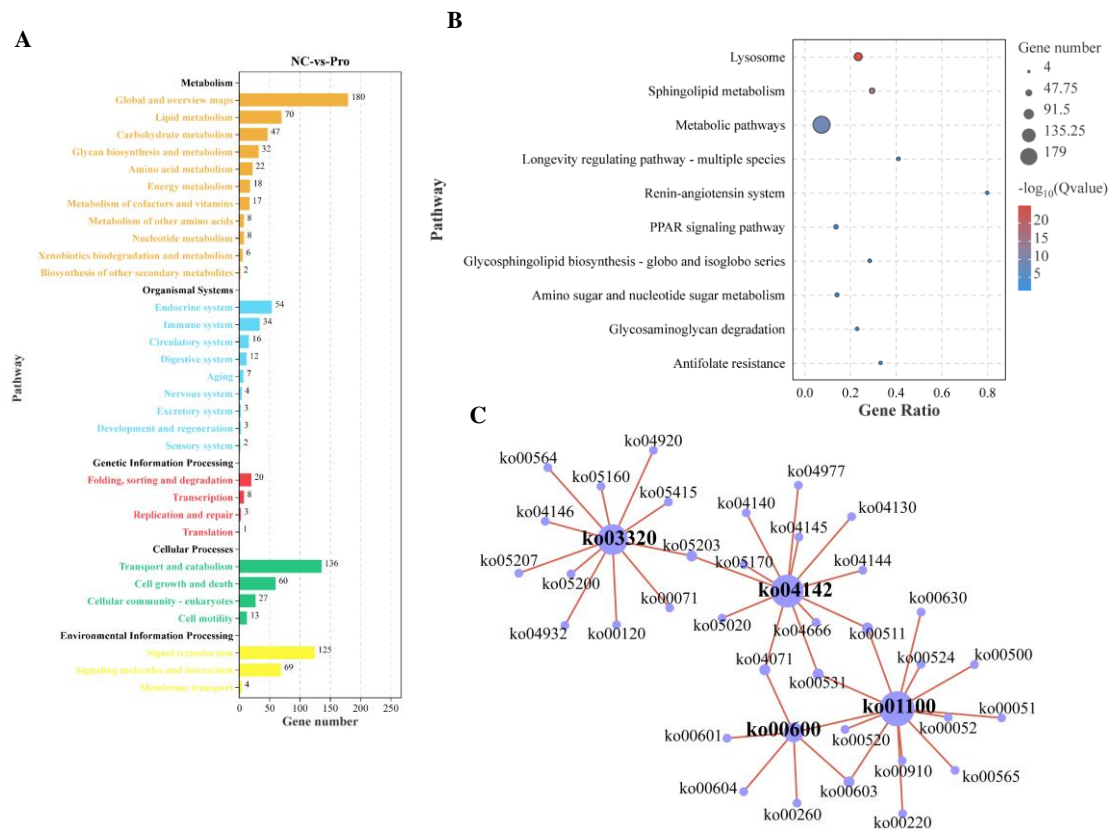

**Figure S6.** KEGG enrichment analysis for the DEGs in the intestines of *C. carpio* between the NC and Pro groups. **(A)** DEGs enrichment in the KEGG A Class and B Class. **(B)** The top 10 enriched KEGG pathways. **(C)** Network plot of the interactions between different pathways after Pro feeding.

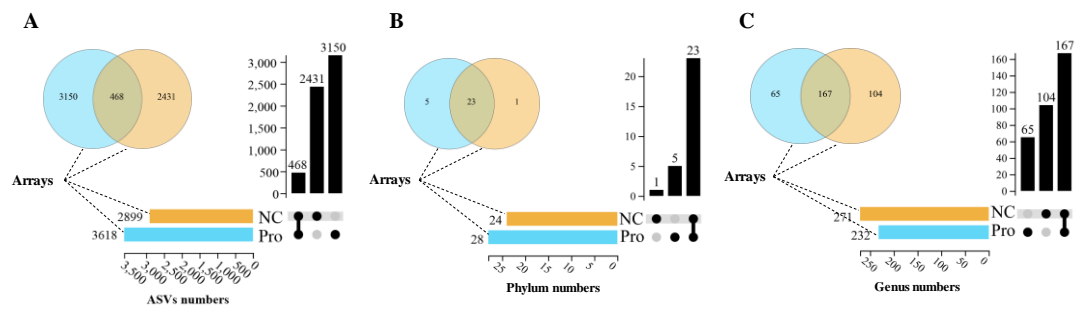

**Figure S7.** Venn diagram in ASVs (A), phylum (B), and genus (C) of intestinal microbiota in NC and Pro groups.
